# Supplementary material for: Ancient Starch Remains Reveal the Vegetal Diet of the Neolithic Late Dawenkou Culture in Jiangsu, East China
Source: Frontiers journal article supplement (doi:10.3389/fevo.2021.722103), 2021-08-25
Supplement: Table_1.DOCX [file Table_1.DOCX]

**Table Liangwangcheng Plant Microfossils Frequency**

|  | level I | | | level II | | | level III | | | Total | | |
| --- | --- | --- | --- | --- | --- | --- | --- | --- | --- | --- | --- | --- |
| Specimen no. | Starch | Phytolith | Other plant and fungi remains | Starch | Phytolith | Other plant and fungi remains | Starch | Phytolith | Other plant and fungi remains | Starch | Phytolith | Other plant and fungi remains |
| M154 | 16 | 1 | 0 | 9 | 7 | 0 | 10 | 27 | 0 | 35 | 35 | 0 |
| M129 | 13 | 8 | 0 | \ | \ | \ | 10 | 0 | 1 | 23 | 8 | 1 |
| M120 | 14 | 0 | 0 | \ | \ | \ | 10 | 0 | 0 | 24 | 0 | 0 |
| M81 | 5 | 11 | 1 | \ | \ | \ | 13 | 2 | 1 | 18 | 13 | 2 |
| M254 | 13 | 3 | 1 | \ | \ | \ | 19 | 2 | 2 | 32 | 5 | 3 |
| M151 | 10 | 0 | 0 | 38 | 0 | 0 | 6 | 0 | 0 | 54 | 0 | 0 |
| M113 | 17 | 0 | 1 | \ | \ | \ | 3 | 0 | 0 | 20 | 0 | 1 |
| M225 | 9 | 5 | 0 | \ | \ | \ | 2 | 4 | 0 | 11 | 9 | 0 |
| M143 | \ | \ | \ | \ | \ | \ | 0 | 0 | 0 | 0 | 0 | 0 |
| M135 | 0 | 0 | 0 | 0 | 4 | 0 | 1 | 4 | 0 | 1 | 8 | 0 |
| M114 | 2 | 2 | 0 | \ | \ | \ | 0 | 0 | 0 | 2 | 2 | 0 |
| M144 | 11 | 0 | 3 | \ | \ | \ | 19 | 0 | 2 | 30 | 0 | 5 |
| M92 | 18 | 1 | 2 | \ | \ | \ | 11 | 6 | 1 | 29 | 7 | 3 |
| M118 | 16 | 0 | 1 | \ | \ | \ | 10 | 0 | 0 | 26 | 0 | 1 |
| M216 | 32 | 0 | 2 | \ | \ | \ | 4 | 0 | 0 | 36 | 0 | 2 |
| M145 | 33 | 1 | 1 | \ | \ | \ | 1 | 0 | 0 | 34 | 1 | 1 |
| M108 | 23 | 0 | 0 | \ | \ | \ | 0 | 0 | 0 | 23 | 0 | 0 |
| M147 | 190 | 0 | 1 | 1 | 0 | 0 | 91 | 0 | 2 | 282 | 0 | 3 |
| M226 | \ | \ | \ | 13 | 16 | 2 | 7 | 2 | 2 | 20 | 18 | 4 |
| M125 | 25 | 0 | 0 | 153 | 0 | 0 | 50 | 1 | 0 | 228 | 1 | 0 |
| M111 | \ | \ | \ | 5 | 0 | 0 | 3 | 0 | 0 | 8 | 0 | 0 |
| M127 | \ | \ | \ | 48 | 1 | 3 | 19 | 3 | 1 | 67 | 4 | 4 |
| M256 | 31 | 0 | 0 | 19 | 0 | 2 | 8 | 0 | 2 | 58 | 0 | 4 |
| M252 | 16 | 12 | 3 | \ | \ | \ | 8 | 0 | 1 | 24 | 12 | 4 |
| M251 | 3 | 1 | 2 | 16 | 0 | 4 | 26 | 2 | 0 | 45 | 3 | 6 |
| M130 | 21 | 1 | 1 | 13 | 1 | 1 | 6 | 5 | 0 | 40 | 7 | 2 |
| M116 | \ | \ | \ | \ | \ | \ | 12 | 0 | 1 | 12 | 0 | 1 |
| M121 | 8 | 0 | 0 | 12 | 1 | 2 | 6 | 10 | 1 | 26 | 11 | 3 |
| M109 | \ | \ | \ | 4 | 3 | 0 | 4 | 0 | 0 | 8 | 3 | 0 |
| M218 | 1 | 3 | 0 | 1 | 1 | 0 | 9 | 2 | 1 | 11 | 6 | 1 |
| M271 | 6 | 16 | 0 | 3 | 3 | 1 | 5 | 9 | 1 | 14 | 28 | 2 |
| Total | 533 | 65 | 19 | 335 | 37 | 15 | 373 | 79 | 19 | 1241 | 181 | 53 |
